# Supplementary material
Source: Springer Nature journal article supplement (https://www.springermedizin.de/resource/supplementary/12913_2013_2971_MOESM4_ESM.pdf/9532496)

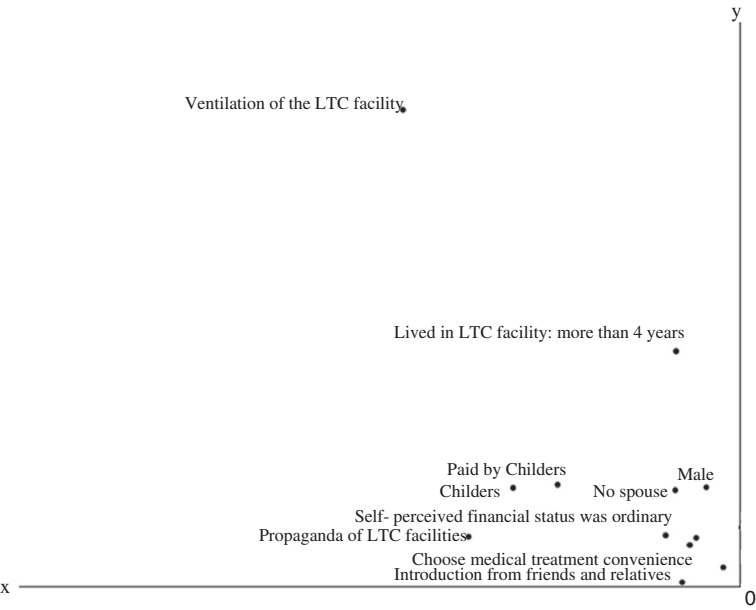

Supplement: MOESM4 [file 9532496]
